# Supplementary material
Source: PubMed Central journal article supplement (PMC9044330)

## SUPPLEMENTAL FIGURE LEGENDS

### Figure S1. Characterization of the murine MLL::AF9-FKBP12 system, Related to Figure 1

- A. Survival curves of mice injected with Lin<sup>-</sup>Sca1<sup>+</sup>c-kit<sup>+</sup> (LSK) cells transformed with untagged MLL::AF9 (black), N-terminal HA-FKBP12-MLL::AF9 (blue) or C-terminal MLL::AF9-HA-FKBP12.
- B. Markers of leukemogenesis at the time of bone marrow harvesting.
- C. Growth curves of untagged MLL::AF9 (black) and MLL::AF9-HA-FKBP12 (red) leukemic cells over 12 days. Data represents the mean and standard deviation of experimental triplicates.
- D. Expression of MLL::AF9 target genes in untagged MLL::AF9 (black) and MLL::AF9-HA-FKBP12 (red) leukemic cells from two independently generated leukemias. Data represent the mean and standard deviation of three independent experiments, measured by Taqman.
- E. Intracellular FACs: Relative Mean Fluorescent Intensity (MFI) of HA upon treatment with dTAG-13 (500nM) at the indicated timepoints. All MFI signal was normalized to DMSO-treated untagged MLL::AF9 cells. Data represents the mean and standard deviation of three independent experiments.
- F. Intracellular FACs: Mean Fluorescent Intensity (MFI) of HA signal upon treatment with DMSO, dNEG-13 (500nM, gray) or dTAG-13 (500nM, red) at the indicated timepoints.
- G. Intracellular FACs: Mean Fluorescent Intensity (MFI) of HA signal. Cells were co-treated with DMSO/MLN-4924 (1 $\mu$ M) and DMSO/dNEG-13 (500nM)/dTAG-13 (500nM) for 24 hours. For the proteasomal rescue, cells were co-treated with carfilzomib (500nM) and DMSO/dNEG-13 (500nM)/dTAG-13 (500nM) for 4 hours.
- H. (Top) Relative expression of *Meis1* and *HoxA9* after 24 hours of treatment with dTAG-13 in a dose-dependent manner, normalized to DMSO treatment. (Bottom) Relative expression of *Meis1* and *HoxA9* upon treatment with 500nM dTAG-13 in a time-dependent manner, normalized to DMSO treatment. Untagged MLL::AF9 cells are in black and MLL::AF9-HA-FKBP12 transformed cells are in red. Data represents the mean and standard deviation of three independent experiments, measured by Taqman.
- I. Relative Expression of *Meis1* and *HoxA9* in MLL::AF9-HA-FKBP12 cells over time with dNEG-13 (500nM, gray) and dTAG-13 (500nM, red) treatment, normalized to DMSO treatment. Data represents the mean and standard deviation of three independent experiments, measured by Taqman.
- J. Cell Proliferation of untagged MLL::AF9 transformed cells (black) cells and MLL::AF9-HA-FKBP12 transformed cells (red) assessed as percent DMSO after 6 days with increasing doses of dTAG-13. Data represents the mean and standard deviation of three independent experiments.
- K. Cell Proliferation of MLL::AF9-HA-FKBP12 cells assessed as percent DMSO after 6 days with increasing doses of dTAG-13 (red) and dNEG-13 (gray). Data represents the mean and standard deviation of three independent experiments.
- L. Cytospins after 5 days of DMSO and dTAG-13 (500nM) treated MLL::AF9-HA-FKBP12 cells. The scale bar marks 90 $\mu$ M.
- M. Apoptosis of DMSO and dTAG-13 (500nM) treated MLL::AF9-HA-FKBP12 cells at 3, 5, and 7 days as measured by Annexin V positive, PI negative cells. Data represents the mean and standard deviation of three independent experiments.

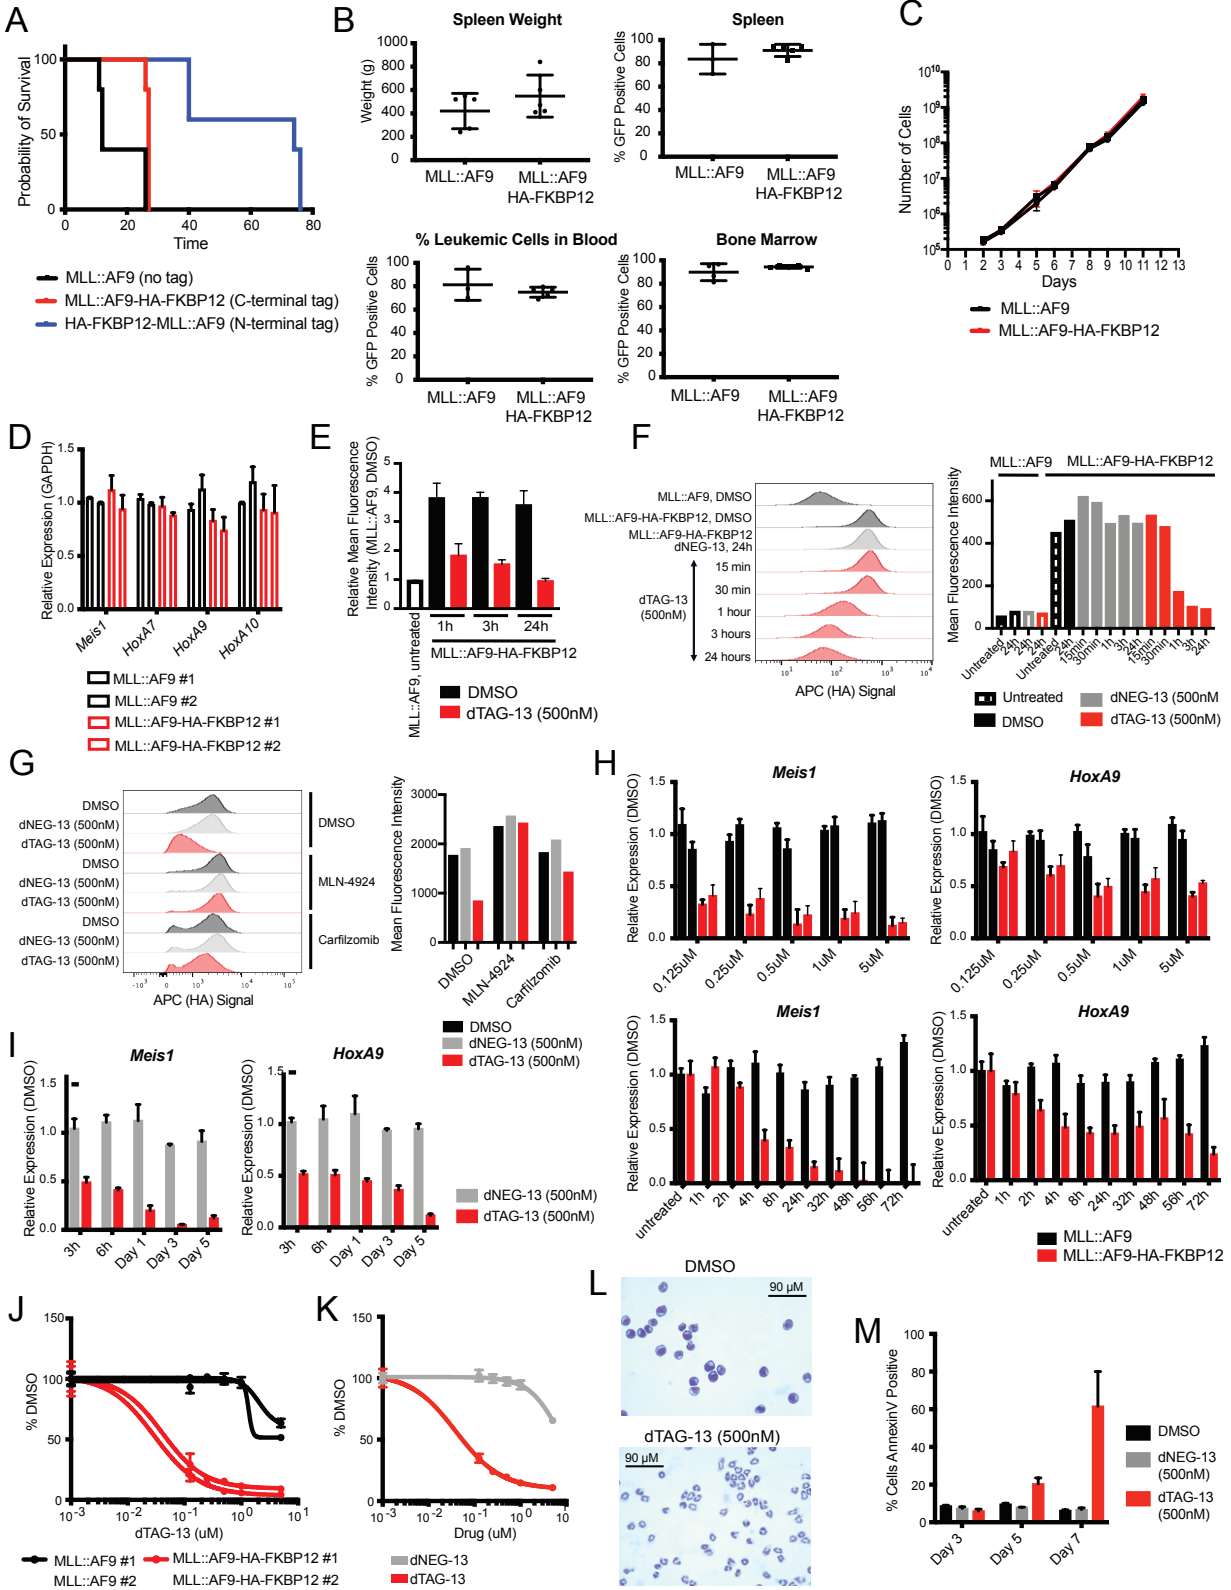

**Figure S2. Volcano plots of RNA-Seq and GSEA analyses following MLL::AF9 degradation, Related to Figure 2.**

- A. Volcano plots of differentially transcribed genes 3 and 24 hours upon dTAG-VHL (500nM) treatment measured by RNA-Seq in the human MLL::AF9-FKBP12 system (Table S1).
- B. Volcano plots of differentially transcribed genes 3 and 24 hours upon dTAG-13 (500nM) treatment measured by RNA-Seq in the murine MLL::AF9-FKBP12 system (Table S1).
- C. Gene expression changes in MLL::AF9-HA-FKBP12 transformed murine cells. (Left) Heatmap of downregulated genes (Fold Change > 1.5,  $p < 0.1$ , Table S1) after 3 hours of treatment with either DMSO or dTAG-13 (500nM). (Right) Heatmap of differentially expressed genes (Fold Change > 2,  $p < 0.1$ , Table S1) after 24 hours of DMSO or dTAG-13 (500nM) treatment.
- D. GSEA comparing the genes affected by MLL::AF9 degradation in murine cells to the top 100 downregulated genes in the human MLL::AF9-HA-FKBP12 transformed CD34<sup>+</sup> system upon MLL::AF9 degradation at 3 hours.
- E. GSEA of gene expression changes in murine MLL::AF9-HA-FKBP12 leukemic cells 5 days upon dTAG-13 (500nM) treatment compared with previously published MLL::AF9 (Bernt et al., 2011; Stavropoulou et al., 2016) or MLL-AF4 (Guenther et al., 2008) target gene lists.
- F. (Left) GSEA of gene expression changes in murine MLL::AF9-HA-FKBP12 leukemic cells 5 days upon dTAG-13 (500nM) treatment compared with genes upregulated (Fold Change > 2,  $p < 0.05$ , Table S1) in neutrophils vs murine hematopoietic stem and multipotent progenitor cells (Lin<sup>-</sup>Sca1<sup>+</sup>c-kit<sup>+</sup> (LSK)). (Right) Cytospins after 5 days of DMSO and dTAG-13 (500nM) treated MLL::AF9-HA-FKBP12 cells. The scale bar marks 90 $\mu$ M.

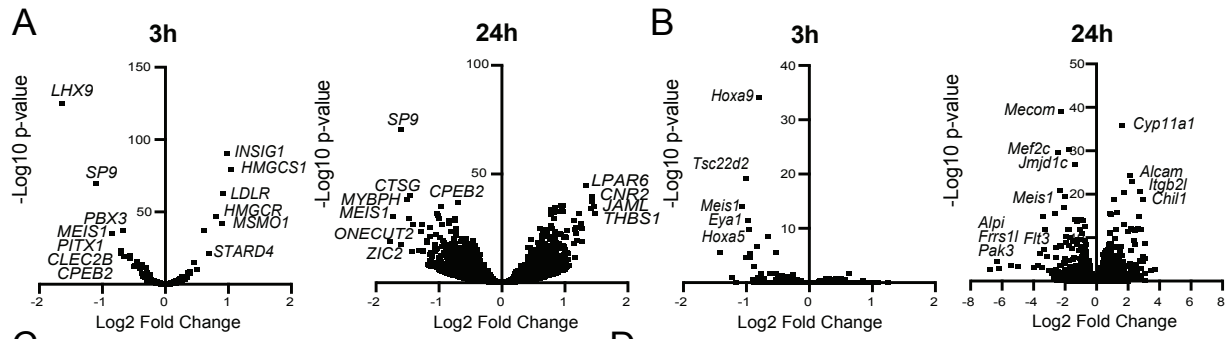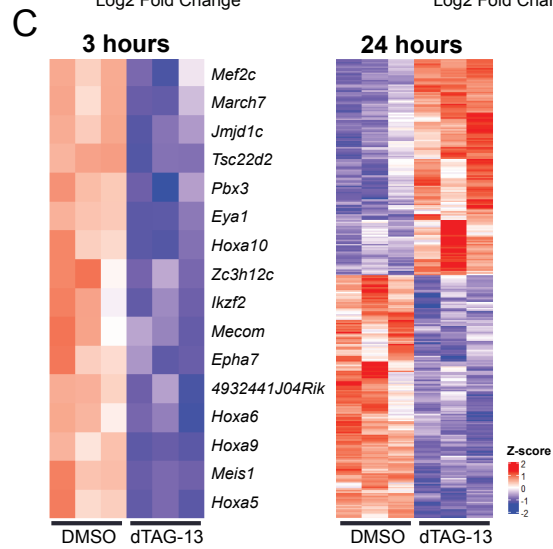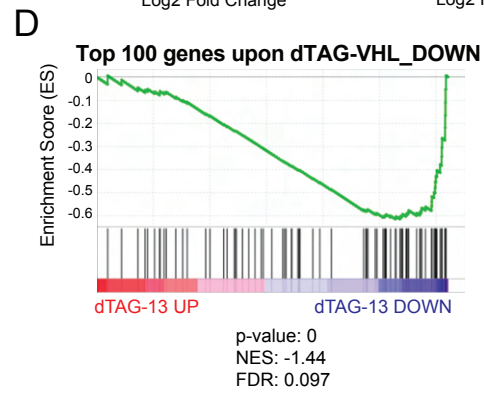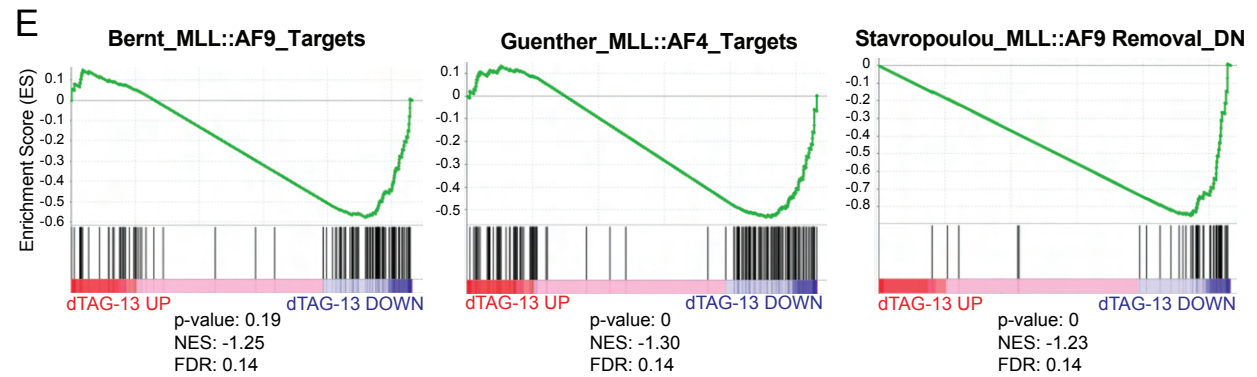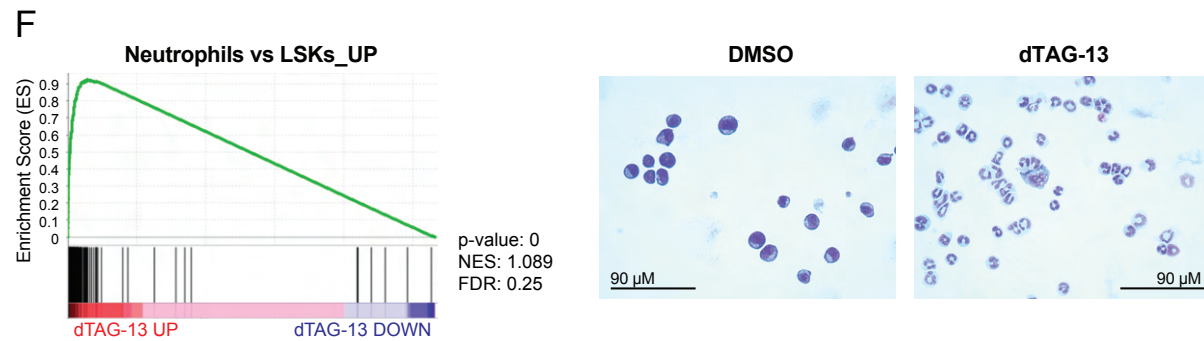

**Figure S3. MLL::AF9 degradation in the human MLL::AF9-FKBP12 system induces transcriptional changes within minutes, related to Figure 3.**

- Heatmap of differentially transcribed genes (Log<sub>2</sub> FC>1, p<0.05, Table S2) at 15min/30min/60min/120min following dTAG-VHL (500nM) treatment (Figure 4D) as measured by SLAM-Seq.
- Venn diagrams depicting the overlap of genes exhibiting decreased transcription (top and middle, Log<sub>2</sub> FC>1, p<0.05) upon dTAG-VHL (500nM) treatment and increased transcription (bottom, Log<sub>2</sub> FC>1, p<0.05) upon dTAG-VHL (500nM) treatment at the indicated timepoints, as measured by SLAM-seq (Table S2).
- Heatmap of PRO-Seq signal at MLL::AF9 target genes (Table S1) after 15min/30min/180min following dTAG-VHL (500nM) treatment.
- Venn diagrams depicting the overlap of genes exhibiting decreased transcription (top, FC>1.5, p<0.0001) upon dTAG-VHL (500nM) treatment and increased transcription (bottom, FC>1.5, p<0.0001) upon dTAG-VHL (500nM) treatment at the indicated timepoints, as measured by PRO-seq (Table S2).
- Schematic depicting how transcription of a generic gene locus is broken down into promoter proximal (pp, TSS to +150bp) and gene body (gb, +250 to TES) regions. Pausing index (PI) is calculated by dividing the promoter proximal (pp) signal by the gene body (gb) signal.
- Gene tracks of PRO-seq signal at *MEIS1*, as a representative MLL::AF9 target gene, and *GAPDH*, as a representative housekeeping gene, at the indicated timepoints upon dTAG-VHL (500nM) treatment. The gene tracks were normalized to coverage data (total read counts).

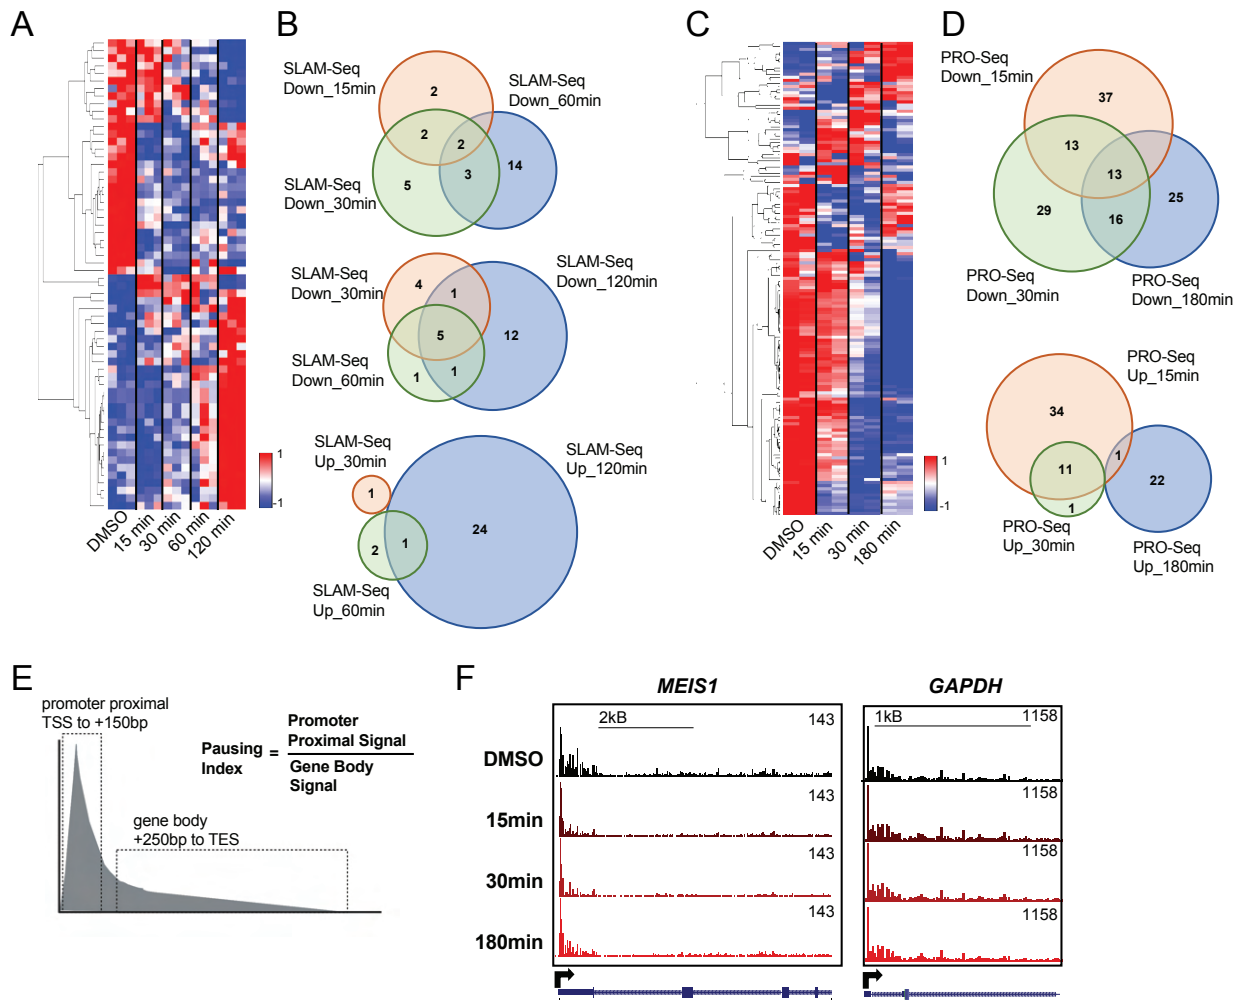

**Figure S4. Additional chromatin occupancy changes upon MLL::AF9 degradation in the human MLL::AF9-FKBP12 system, related to Figure 4.**

- A. Boxplot of total reads at the promoter (TSS -1kB/+3kB) following H3K79me2 ChIP-Seq of DMSO-treated cells at 'highly sensitive genes' (red, Table S1), all other MLL::AF9 target genes (black, Table S1) and non MLL::AF9 bound genes (gray).
  - B. (Left) Boxplots of fold change in ChIP-seq signal for H3K27ac and H3K9ac at promoters (TSS -1kB/+3kB, marked as TSS) 3 or 24 hours upon dTAG-VHL (500nM) treatment, as indicated. (Right) Gene tracks of ChIP-seq signal at MLL::AF9 target genes and *GAPDH*, as a representative housekeeping gene, 3 and 24 hours upon dTAG-VHL (500nM) treatment, as indicated. The gene tracks were normalized to coverage data (total read counts) using IGV.
  - C. Boxplots of total reads at the promoter (TSS -1kB/+3kB) following H3K27ac and H3K9ac ChIP-Seq of DMSO-treated cells at 'highly sensitive genes' (red, Table S1), all other MLL::AF9 target genes (black, Table S1), and non MLL::AF9 bound genes (gray).
  - D. Gene tracks of replicate ATAC-seq signal at MLL::AF9 target genes and *GAPDH*, as a representative housekeeping gene, following 3 hours of dTAG-VHL (500nM) treatment. The gene tracks were normalized to coverage data (total read counts) using IGV.
  - E. Boxplot of fold change in ChIP-seq signal for H3K4me3 at promoters (TSS -1kB/+3kB, marked as TSS) 3 hours following dTAG-VHL (500nM) treatment.
  - F. Boxplots of fold change in ChIP-seq signal for MLL1-N-terminal and MLL1-C-terminal at promoters (TSS -1kB/+3kB, marked as TSS) 3 hours upon dTAG-VHL (500nM) treatment.
  - G. Gene tracks of ChIP-seq signal at representative genes 3 hours upon dTAG-VHL (500nM) treatment, assessing specificity of initiating (pSer5) versus elongating (pSer2) RNA Pol II signal. The gene tracks were normalized to coverage data (total read counts) using IGV.
- ns  $p > 0.5$ ; \*  $p \leq 0.05$ ; \*\*  $p \leq 0.01$ ; \*\*\*  $p \leq 0.001$ ; \*\*\*\*  $p \leq 0.001$  (Mann Whitney test)

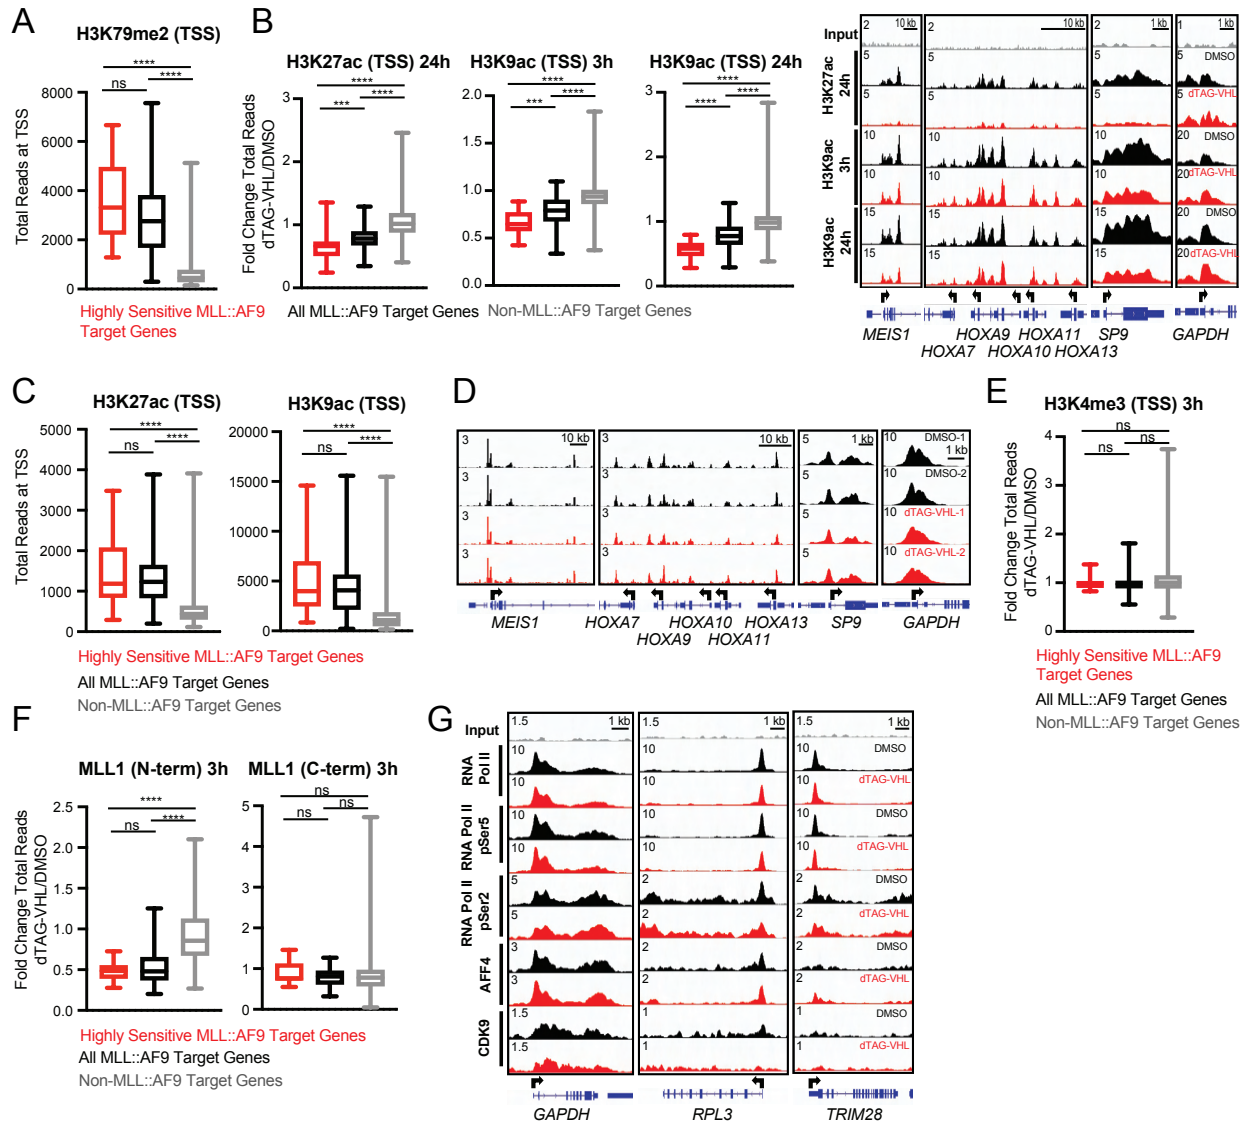

**Figure S5. Cellular consequences are induced more rapidly upon DOT1L/MENIN combination treatment, related to Figure 5.**

- A. Cell proliferation of two independently generated human MLL::AF9-HA-FKBP12 leukemic cell lines assessed as percent DMSO after 6 days with increasing doses of either VTP-50469 (left) or EPZ-5676 (right) either as single agent treatment (black) or in combination (red). Data represent the mean and standard deviation of three independent experiments, IC50 values are indicated.
- B. Cell proliferation of human MLL::AF9 rearranged MOLM13 cells assessed as percent DMSO after 6 days with increasing doses of either VTP-50469 (left) or EPZ-5676 (right) either as single agent treatment (black) or in combination (red). Data represent the mean and standard deviation of three independent experiments, IC50 values are indicated.
- C. Cell proliferation of human untransformed hematopoietic stem and progenitor cells (CD34<sup>+</sup>) cells assessed as percent DMSO after 6 days with increasing doses of either VTP-50469 (left) or EPZ-5676 (right) either as single agent treatment (black) or in combination (red). Data represent the mean and standard deviation of three independent experiments.
- D. Cell proliferation of human HL60 cells (not MLL-rearranged) assessed as percent DMSO after 6 days with increasing doses of either VTP-50469 (left) or EPZ-5676 (right) either as single agent treatment (black) or in combination (red). Data represent the mean and standard deviation of three independent experiments.
- E. Cell proliferation of human MLL::AF9-HA-FKBP12 leukemic cells assessed as percent DMSO after 1, 2, 3, 4, 5, and 6 days with increasing doses of dNEG-VHL (black), dTAG-VHL (red), EPZ-5676 (dark green), EPZ-5676 + 100nM VTP-50469 (light green), VTP-50469 (dark blue), and VTP-50469 + 250nM EPZ-5676 (light blue). Data represent the mean and standard deviation of three independent experiments.
- F. (Top) Assessment of differentiation via CD14 levels by Mean Fluorescence Intensity after 1, 2, 3 and 4 days of DMSO, dNEG-VHL (500nM, gray), dTAG-VHL (500nM, red), EPZ-5676 (250nM, green), VTP-50469 (100nM, blue), or combination EPZ-5676 (250nM) + VTP-50469 (100nM) (orange) treatment of MLL::AF9-HA-FKBP12 transformed human cells. Data represents the mean and standard deviation of triplicates. (Bottom) Apoptosis of MLL::AF9-HA-FKBP12 human cells measured after 1, 2, 3 and 4 days of DMSO, dNEG-VHL (500nM, gray), dTAG-VHL (500nM, red), EPZ-5676 (250nM, green), VTP-50469 (100nM, blue), or combination EPZ-5676 (250nM) + VTP-50469 (100nM) (orange) treatment of MLL::AF9-HA-FKBP12 transformed human cells. Annexin V positive, PI negative cells were counted and quantified, data represent the mean and standard deviation of three independent experiments.
- G. Western blot in the human MLL::AF9-FKBP12 cells treated with DMSO or the irreversible pan-caspase inhibitor Z-VAD-FMK (50μM) and with DMSO, EPZ-5676 (250nM), VTP-50469 (100nM), EPZ-5676 (250nM) + VTP-50469 (100nM), or dTAG-VHL (500nM) as indicated. Cleaved PARP (C PARP) and total PARP (T PARP) levels were assessed by immunoblotting at the indicated timepoints.
- H. Apoptosis of MLL::AF9-HA-FKBP12 human cells measured after 2, 3 and 4 days of DMSO, dNEG-VHL (500nM), dTAG-VHL (500nM), EPZ-5676 (250nM), VTP-50469 (100nM), or combination EPZ-5676 (250nM) + VTP-50469 (100nM) treatment. Cells were either co-treated with DMSO or Z-VAD-FMK (50μM), as indicated. Annexin V positive, PI negative cells were counted and quantified at the indicated timepoints, data represent the mean and standard deviation of three independent experiments.



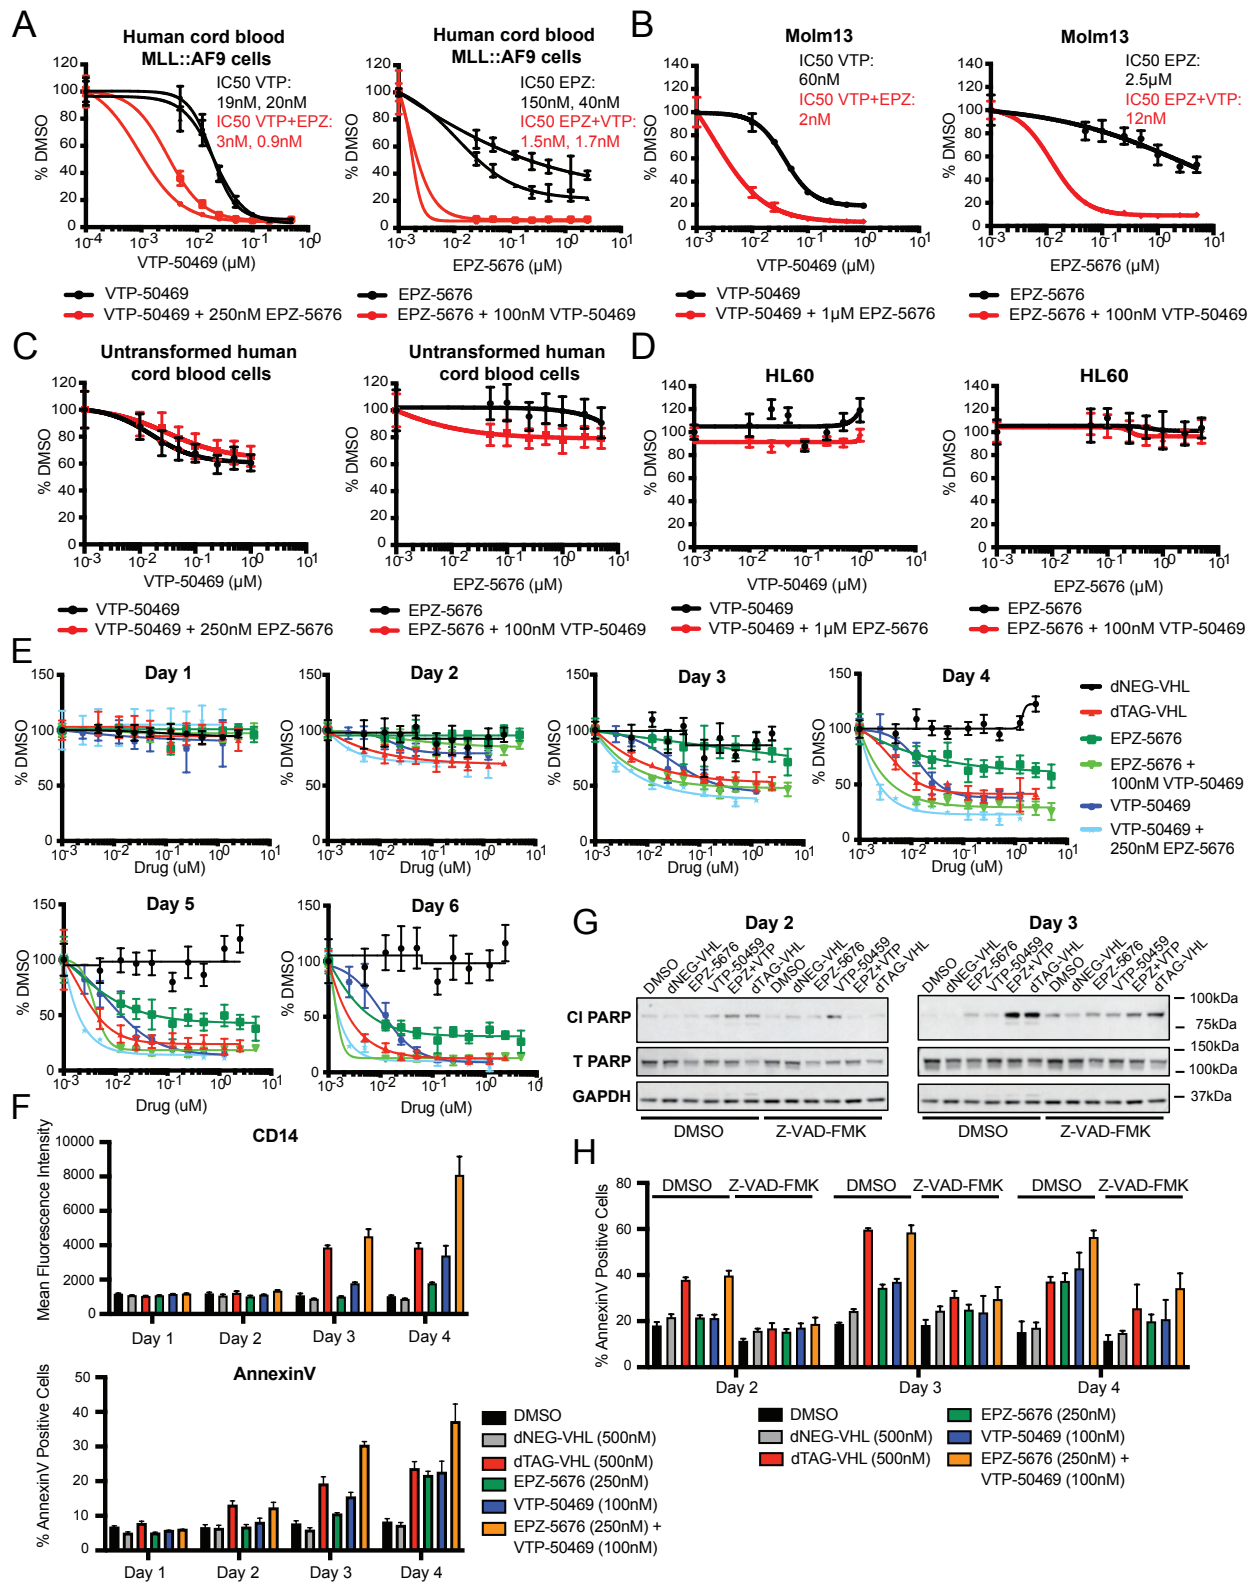

**Figure S6. Combination of DOT1L and MENIN inhibition mimics the chromatin changes induced by MLL::AF9 degradation, related to Figure 6.**

- A. Gene tracks of H3K27ac ChIP-seq signal following 4 days of treatment and RNA-Seq tracks following 5 days of treatment with DMSO (black), EPZ-5676 (250nM, green), VTP-50469 (100nM, blue), EPZ-5676 (250nM) + VTP-50469 (100nM) (orange) or dTAG-VHL (500nM, red) in the human MLL::AF9-FKBP12 system. The gene tracks were normalized to coverage data (total read counts) using IGV.
- B. Gene tracks of MLL1 and H3K27ac ChIP-seq signal in MOLM13 cells following 4 days of treatment and representative RNA-Seq tracks following 5 days of treatment with DMSO (black), EPZ-5676 (1µM, green), VTP-50469 (100nM, blue), or EPZ-5676 (1µM) + VTP-50469 (100nM) (orange). The gene tracks were normalized to coverage data (total read counts) using IGV.
- C. (Left) Average/meta plot of MLL1 ChIP reads in MOLM13 cells across the promoter (TSS - 3kb/+3kb) of MLL::AF9 target genes with detectable MLL1 signal in MOLM13 cells (Table S4), 4 days following DMSO (black), EPZ-5676 (1µM, green), VTP-50469 (100nM, blue), or EPZ-5676 (1µM) + VTP-50469 (100nM) (orange) treatment. (Right) Boxplot of change in ChIP-seq signal for MLL1 at MOLM13-MLL::AF9 target genes (Table S4) around the TSS (TSS -1kb/+3kb) 4 days upon treatment with EPZ-5676 (1µM, green), VTP-50469 (100nM, blue), or EPZ-5676 (1µM) + VTP-50469 (100nM) (orange).  
 ns  $p > 0.5$ ; \*  $p \leq 0.05$ ; \*\*  $p \leq 0.01$ ; \*\*\*  $p \leq 0.001$ ; \*\*\*\*  $p \leq 0.001$  (Mann Whitney test)

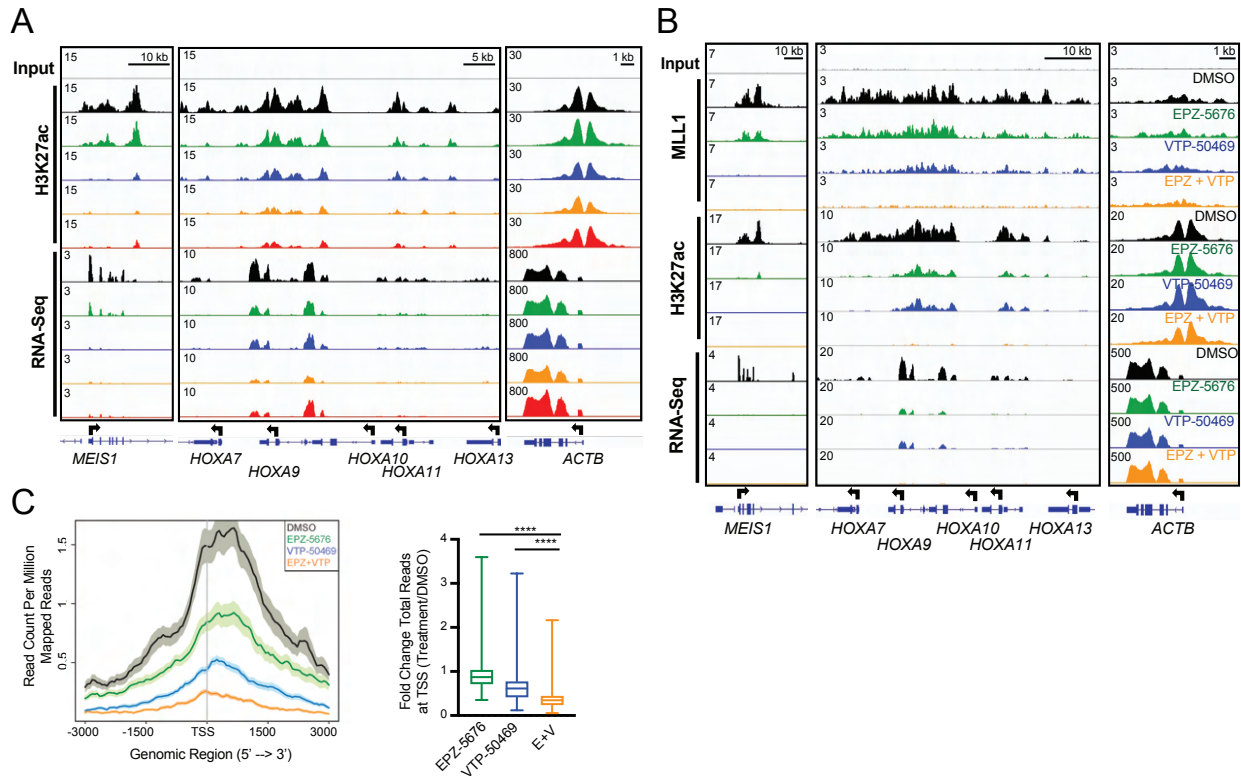

Supplement: NIHMS1787502-supplement-Supplemental_material.pdf [file NIHMS1787502-supplement-Supplemental_material.pdf]
